# Supplementary material
Source: MDPI journal article supplement (https://www.mdpi.com/1996-1944/15/11/3743)
Supplement: s1 [file s1]

Archive with 2 entries (2 files):
- materials-1703215-supplementary.pdf
- SI_Crosssection_Logo.avi
